# Supplementary material
Source: PubMed Central journal article supplement (PMC5411799)
Supplement: ajcr0007-0923-f5.pdf [file ajcr0007-0923-f5.pdf]

# Drug profiling neurofibromatosis cells

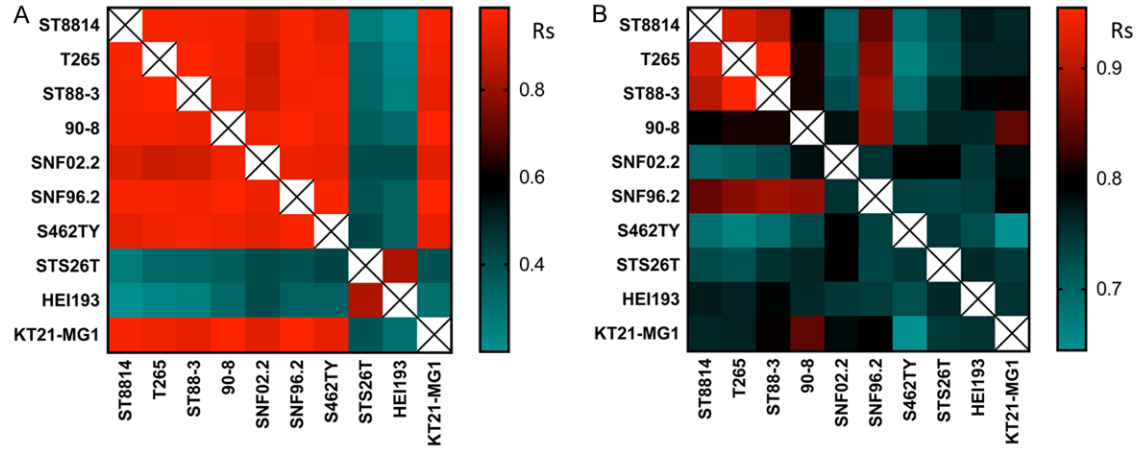

**Figure S1.** A. A heat map of Spearman's rank correlation coefficients between IC50 values for MEK inhibitors alone shown in **Figure 4C**. B. A heat map of Spearman's rank correlation coefficients between IC50 values for inhibitors excluding MEK inhibitors shown in **Figure 4D**.
